# Supplementary material
Source: Research Square preprint supplement (doi:10.21203/rs.3.rs-9679993/v1)
Supplement: Supplementary file 1 [file c50268438aad554b4c22bc77.docx]

# **INTERVIEW GUIDE FOR KEY INFORMANT INTERVIEW AND FOCUS GROUP DISCUSSIONS**

# KEY INFORMANT INTERVIEW GUIDE

**Title of the project: Effectiveness of nutrition interventions to Improve Maternal and Child Health Outcomes: The Case of the Uganda Community Connector**

**Researchers**

- Agaba Edgar
- Prof. Xikombiso Mbhenyane (PhD)
- Per Ole Iversen (MD, PhD)
- Peter Milton Rukundo (PhD)

**Instructions**

Thank you for giving us the time to speak with you today. You are being asked to voluntarily participate in an interview for a study being conducted by Edgar Agaba, a student at the Division of Human Nutrition, Faculty of Medicine and Health Sciences, Stellenbosch University, with Prof. Xikombiso Mbhenyane, Per Ole Iversen (MD, PhD), and Peter Milton Rukundo (PhD).

Please read the informed consent form for the participant (s).

**PARTICIPANT INFORMATION**

Interview ID: _______________________

Date of interview: ___________________

District: ____________________________

**Type of participant:**☐ Policymaker
☐ Health worker
☐ Programme implementer
☐ Community leader
☐ Other (specify): __________________

**Institution/Organisation: __________________________**

**Sex:**☐ Male
☐ Female
☐ Prefer not to say

**Age: __________________**

Interviewer initials: __________________

**THEME 1: REACH**

| **Dimension** | **Key questions** | **Probes and follow-up questions** |
| --- | --- | --- |
| **Who**will participate? | To whom did the community connector initiative appeal? | Who intervened in the community connector plan to reach?  Define the intended beneficiaries (target population(s). |
|  | How and where did the interventions reach the beneficiaries? | How did the community connector promote the interventions? |
|  |  | How did you know the interventions reached the people, and who participated? |
|  | How did you know that the beneficiaries represented the intended beneficiaries (target population)? | What methods were used to attract underserved populations and focus on **health inequities?**  What information is available to determine whether the sample represents the target audience? |

**THEME 2: ADOPTION**

| **Dimension** | **Key questions** | **Probes and follow-up questions** |
| --- | --- | --- |
| Where were the community connector initiatives conducted? | What settings or organisational types did the programme target (e.g., schools, workplaces, clinics, community settings, or organisations)? | What were the key characteristics of the settings in which the programme participated?  Who was most interested in this programme/project and why?  What were the characteristics of settings that did not participate in the community connector project (e.g., location, facilities, etc.) |
|  | How many settings and organisations did you estimate would use the programme or participate in the project? | What external or environmental supports or threats were there?  How did you know if communities used the diverse initiatives of the project?  Who can help collect information about this? |
|  | **Who** delivered the programme (actually did the work), and did they have the skills and time? | What were the expertise or characteristics of those (e.g., staff, volunteers) who delivered the intervention? |

**THEME 3: IMPLEMENTATION**

| **Dimension** | **Key questions** | **Probes and follow-up questions** |
| --- | --- | --- |
| **How consistently** did you deliver the programme | **How was the initiative delivered, including adjustments and adaptations?** | What key elements of the project were delivered by the project to ensure the programme succeeded?  What were the key elements of the initiative that must be delivered in the future for this programme to succeed? |
|  | **To what extent were the key aspects of the programme delivered as intended?** | How did you assess programme delivery (self-report, audit, checklists)?  Describe the feasibility of these methods. |
|  | What adaptations or modifications would be necessary to help implement the project to fit diverse settings? | What were the likely implementation challenges that needed to be overcome? |
|  | How did you know what adaptations or modifications were made during the programme? | Who helped you to keep track of modifications or adjustments made? |
|  | What were some obstacles to consistent implementation? | Are there competing projects or programmes to consider? |
|  | **What costs and resources (including time and burden, not just money) needed to be considered?** | Were these costs and resources available and reasonable to ask for (high enough priority?) |

**THEME 4: MAINTENANCE/ SUSTAINABILITY**

| **Dimension** | **Key questions** | **Probes and follow-up questions** |
| --- | --- | --- |
| **Do you think that the project needs to be** renewed? | **What happened over the long-term? Did the project make headway? What will happen over the long-term in the next 3-5 years?**  Consider both Individual beneficiaries and Settings (e.g., support longer-term benefits to children, youth, pregnant women and Lactating mothers, community etc.) | |
|  | **Can organisations in this community sustain the initiative, such as the community connector, over time, and were there plans to leave trained staff or activities in place?** | What infrastructure supports were needed to sustain the initiative?  Is there an infrastructure and funding still available to run the set of interventions like the community connector?  How were these initiatives by community connector aligned with current and future policies |
|  | **How likely will the community connector produce lasting effects for individual participants?** | How will individuals continue to deliver key programme components of the community connector over time? If not, why? If yes, how? |
|  | How will you be able to follow your initiative for an extended period? | How will you continue to track success and provide ongoing feedback? “How’s it working for you?” |
|  | How will you spread the word about lessons learnt? |  |
|  | What are likely modifications or adaptations would you have made to sustain the initiative over time (e.g., lower cost, different staff, reduced intensity, different settings)? Etc. | Did you continue to track progress? How can you track the significant changes made over time? |

**THEME 5: EFFECTIVENESS**

| **Dimension** | **Essential questions (ones in bold most essential to consider)** | **Probes and follow-up questions** |
| --- | --- | --- |
| **What results?** | **What were the most important outcomes you expected to see in the community connector?** | What were the targeted individual-level changes?  How did you measure these changes?  Who would care about the outcomes of this programme?  How did you share these outcomes? |
|  | **How likely would this project/initiative achieve its key outcomes?** | What were the biggest threats to seeing the outcomes you wanted? |
|  | Do you think the community connector programme or policy will be effective for those most in need?  What unintended consequences or outcomes did you see or are you seeing now? | How would the community connector look like it needs to be adapted to benefit the targeted beneficiaries?  What went/has gone wrong in other community connector interventions? |

# **FOCUS GROUP DISCUSSION GUIDE**

**Title of the project: Effectiveness of Nutrition Interventions to Improve Maternal and Child Health Outcomes: The Case of the Uganda Community Connector**

**Researchers:**

- Agaba Edgar
- Prof. Xikombiso Mbhenyane (PhD)
- Per Ole Iversen (MD, PhD)
- Peter Milton Rukundo (PhD)

**Instructions**

Thank you for giving us the time to speak with you today. You are being asked to voluntarily participate in an interview for a study being conducted by Edgar Agaba, a student at the Division of Human Nutrition, Faculty of Medicine and Health Sciences, Stellenbosch University, with Prof. Xikombiso Mbhenyane, Per Ole Iversen (MD, PhD), and Peter Milton Rukundo (PhD).

Please read the informed consent form for the participants and ensure everyone signs it.

**PARTICIPANT INFORMATION**

Interview ID: _______________________

Date of interview: ___________________

District: ____________________________

Village: ____________________________

**Focus Group Discussion type:**☐ Women of children under 5 years
☐ Youth
☐ Community members

**Sex:**☐ Male
☐ Female
☐ Prefer not to say

**THEME 1: REACH**

| **Dimension** | **Key questions** | **Probes and follow-up questions** |
| --- | --- | --- |
| **Who**will participate? | To whom did the community connector initiative appeal? | Who intervened in the community connector plan to reach?  Define the intended beneficiaries (target population(s). |
|  | How and where did the interventions reach the beneficiaries? | How did the community connector promote the interventions? |
|  |  | How did you know the interventions reached the people, and who participated? |
|  | How did you know that the beneficiaries represented the intended beneficiaries (target population)? | What methods were used to attract underserved populations and focus on **health inequities?**  What information is available to determine whether the sample represents the target audience? |

**THEME 2: ADOPTION**

| **Dimension** | **Key questions** | **Probes and follow-up questions** |
| --- | --- | --- |
| **Where**were the community connector initiatives conducted? | **What settings or organisational types did the programme target**(e.g., schools, workplaces, clinics, community settings, or organisations)? | What were the key characteristics of the settings in which the programme participated?  Who was most interested in this programme/project and why?  What were the characteristics of settings that did not participate in the community connector project (e.g., location, facilities, etc.) |
|  | *** How many settings and organisations did you estimate would use the programme or participate in the project?** | What external or environmental supports or threats were there?  How did you know if communities used the diverse initiatives of the project?  Who can help collect information about this? |
|  | **Who** delivered the programme (actually did the work), and did they have the skills and time? | What were the expertise or characteristics of those (e.g., staff, volunteers) who delivered the intervention? |

**THEME 3: IMPLEMENTATION**

| **Dimension** | **Key questions** | **Probes and follow-up questions** |
| --- | --- | --- |
| **How consistently** did you deliver the programme | How was the initiative delivered, including adjustments and adaptations? | What key elements of the project were delivered by the project to ensure the programme succeeded?  What were the key elements of the initiative that must be delivered for this programme to succeed? |
|  | To what extent were the key aspects of the programme delivered as intended? | How did you assess programme delivery (self-report, audit, checklists)? Describe the feasibility of these methods. |
|  | What adaptations or modifications would be necessary to help implement the project to fit diverse settings? | What were the likely implementation challenges that needed to be overcome? |
|  | How did you know what adaptations or modifications were made during the programme? | Who helped you to keep track of modifications or adjustments made? |
|  | What were some obstacles to consistent implementation? | Are there competing projects or programmes to consider? |
|  | **What costs and resources (including time and burden, not just money) needed to be considered?** | Were these costs and resources available and reasonable to ask for (high enough priority?) |

**THEME 4: MAINTENANCE/ SUSTAINABILITY**

| **Dimension** | **Key questions** | **Probes and follow-up questions** |
| --- | --- | --- |
| **Do you think that the project needs to be** renewed? | **What happened over the long-term? Did the project make headway? What will happen over the long-term in the next 3-5 years?**  Consider Individual beneficiaries and Settings (e.g., support longer-term benefits to children, youth, pregnant women, and Lactating mothers, community, etc.) | |
|  | Can organisations in this community sustain the initiative, such as the community connector, over time, and were there plans to leave trained staff or activities in place? | What infrastructure supports were needed to sustain the initiative?  Is there an infrastructure and funding still available to run the set of interventions like the community connector?  How were these initiatives by community connector aligned with current and future policies |
|  | How likely will the community connector produce lasting effects for individual participants? | How will individuals continue to deliver key programme components of the community connector over time? If not, why? If yes, how? |
|  | How will you be able to follow your initiative for an extended period? | How will you continue to track success and provide ongoing feedback? “How’s it working for you?” |
|  | How will you spread the word about lessons learnt? |  |
|  | What modifications or adaptations would you have made to sustain the initiative over time (e.g., lower cost, different staff, reduced intensity, diverse settings)? | Did you continue to track progress? How can you track the significant changes made over time? |

**THEME 5: EFFECTIVENESS**

| **Dimension** | **Essential questions** | **Probes and follow-up questions** |
| --- | --- | --- |
| **What results?** | What were the most important outcomes you expected to see in the community connector? | What were the targeted individual-level changes?  How did you measure these changes?  Who would care about the outcomes of this programme?  How did you share these outcomes? |
|  | How likely would this project/initiative achieve its key outcomes? | What were the biggest threats to seeing the outcomes you wanted? |
|  | Do you think the community connector programme or policy will be effective for those most in need?  What unintended consequences or outcomes did you see or are you seeing now? | How would the community connector look like it needs to be adapted to benefit the targeted beneficiaries?  What went/has gone wrong in other community connector interventions? |
